# Supplementary material for: Identification of Intrinsic Features for Cortical Separability of Human and Mouse Neurons
Source: Research Square preprint supplement (doi:10.21203/rs.3.rs-5125843/v1), 2024-10-14
Supplement: Supplementary file 1 [file 726cbdae27a080f0829ad9ee.xlsx]

## Sheet: Sheet1
	FL vs. PL	FL vs. TL	PL vs. TL
Human	0.36771	0.299356	0.382821
Mouse	0.0595399	0.256464	0.192805
ratio	6.17586	1.16724	1.98554
