# Supplementary material for: Identification of Intrinsic Features for Cortical Separability of Human and Mouse Neurons
Source: Research Square preprint supplement (doi:10.21203/rs.3.rs-5125843/v1), 2024-10-14
Supplement: Supplementary file 2 [file a68b37f458f97873fb4260d9.docx]

| Patient | Age | Sex | Diagnosis | Tumor/Disease Location | Neuron Specimen Location | #Neurons  (2363) |
| --- | --- | --- | --- | --- | --- | --- |
| H001 | 49 | M | Glioblastoma, IDH-wildtype, CNS WHO grade 4 | frontal/parietal lobes (L) | MFG near ACG | 48 |
| H002 | 36 | M | Glioblastoma, IDH-wildtype, CNS WHO grade 4 | frontal/temporal/insular/parietal lobes (L) | SFG (R)* | 18 |
| H003 | 49 | F | Diffuse astrocytic glioma, H3-wildtype and IDH-wildtype, NOTCH1 mutant, Not Elsewhere Classified，CNS WHO grade 1 | thalamus (R) | IPL near AG | 225 |
| H004 | 71 | F | Glioblastoma, IDH-wildtype, CNS WHO grade 4 | temporal/insular lobes (R) | IFG | 4 |
| H005 | 36 | F | Diffuse hemispheric glioma, H3 G34-mutant, CNS WHO grade 4 | frontal lobe (R) | MFG | 335 |
| H006 | 63 | M | Glioblastoma, IDH-wildtype, CNS WHO grade 4 | temporal lobe (R) | STG | 171 |
| H007 | 35 | F | epidermoid cyst | middle cranial fossa (L) | MTG | 21 |
| H008 | 47 | F | Glioblastoma, IDH-wildtype, CNS WHO grade 4 | parietooccipital (L); corpus callosum | PL | 80 |
| H009 | 46 | M | Astrocytoma, IDH-mutant, CNS WHO grade 4 | frontal lobe (L);  ACC (L); Corpus Callosum | SFG | 17 |
| H010 | 41 | M | Astrocytoma, IDH-mutant, CNS WHO grade 2 | temporal lobe (L) | TP | 294 |
| H011 | 42 | F | Epilepsy | temporal lobe (R); hippocampus (R) | STG | 31 |
| H012 | 28 | F | Subependymoma, CNS WHO grade 1 | lateral ventricles (R) | PL | 4 |
| H013 | 18 | M | *Diffuse high-grade glioma, H3-wildtype and IDH-wildtype, RTK 1,* CNS WHO grade 4 | frontal lobe (R); ACC (R); Corpus Callosum | (S,M)FG | 13 |
| H014 | 34 | M | Central neurocytoma, CNS WHO grade 2 | lateral ventricles (R) | (S,M)FG | 267 |
| H015 | 65 | F | Metastases to the brain and spinal cord parenchyma | frontal lobe (R) | (S,M,I)FG | 14 |
| H016 | 55 | M | Glioblastoma, IDH-wildtype, CNS WHO grade 4 | parietal lobe (L) | PL | 1 |
| H017 | 71 | M | Glioblastoma, IDH-wildtype, CNS WHO grade 4 | frontal/temporal/insular/parietal lobes (R); hippocampus (R) | IFG | 2 |
| H018 | 41 | F | Fibrous meningioma, CNS WHO grade 1 | lateral ventricles (L) | PL | 193 |
| H019 | 67 | F | Oligodendroglioma, IDH-mutant, and 1p/19q-codeleted, CNS WHO grade 3 | frontal pole (R); basal ganglia (R); corpus callosum | SFG | 8 |
| H020 | 39 | F | Astrocytoma, CNS WHO grade 4 | lateral ventricles (R); parietal lobe (R); corpus callosum | PL | 197 |
| H021 | 42 | F | Central neurocytoma, lipoma, CNS WHO grade 2 | lateral ventricle (R); third ventricle | FL | 367 |
| H022 | 54 | M | Anaplastic astrocytoma, glioblastoma, CNS WHO grade 4 | temporal lobe (L) | TP | 7 |
| H023 | 70 | M | Glioblastoma, CNS WHO grade 4 | thalamus (L);  basal ganglia (L) | (M,I)FG | 46 |

*(R) represents samples taken from the right hemisphere. If not specified, the sample is from the same hemisphere as the lesion.
