# Supplementary material for: Identification of Intrinsic Features for Cortical Separability of Human and Mouse Neurons
Source: Research Square preprint supplement (doi:10.21203/rs.3.rs-5125843/v1), 2024-10-14
Supplement: Supplementary file 3 [file d98db791cea8cc76e13a3ea5.xlsx]

## Sheet: Sheet1
Lobe	Human region	Mouse region	References
FL	PrCG	MOp	Banker, L., & Tadi, P. (2019). Neuroanatomy, precentral gyrus.
	SFG (partially)	MOs	Lazari, A., Tachrount, M., Valverde, J. M., Papp, D., Beauchamp, A., McCarthy, P., ... & Mars, R. B. (2024). The mouse motor system contains multiple premotor areas and partially follows human organizational principles. Cell Reports, 43(5).
	OFCl, OFCm	ORB	Rudebeck, P. H., & Rich, E. L. (2018). Orbitofrontal cortex. Current Biology, 28(18), R1083-R1088.
PL	PoCG	SSp	DiGuiseppi, J., & Tadi, P. (2023). Neuroanatomy, postcentral gyrus. In StatPearls [internet]. StatPearls Publishing.
	SPL, IPL, SMG	SSs, PTLp	Benarroch, E. E. (2006). Basic neurosciences with clinical applications. Elsevier Health Sciences. Cabeza, R., Ciaramelli, E., Olson, I. R., & Moscovitch, M. (2008). The parietal cortex and episodic memory: an attentional account. Nature reviews neuroscience, 9(8), 613-625. Hutchinson, J. B., Uncapher, M. R., & Wagner, A. D. (2009). Posterior parietal cortex and episodic retrieval: convergent and…
TL	STG, TTG	AUD	Mangold, S. A., & Das, J. M. (2023). Neuroanatomy, cortical primary auditory area. In StatPearls [Internet]. StatPearls Publishing. Gaillard F, Thibodeau R, Knipe H, et al. Heschl's gyrus. Reference article, Radiopaedia.org (Accessed on 14 Aug 2024) https://doi.org/10.53347/rID-31775 Ehret, G. (1997). The auditory cortex. Journal of Comparative Physiology A, 181, 547-557.
	PHG	PERI	Van Hoesen, G. W. (1995). Anatomy of the medial temporal lobe. Magnetic resonance imaging, 13(8), 1047-1055.
	EC	ENT	[anatomy*]
OL	Cun, LiG	VIS	Rehman, A., & Al Khalili, Y. (2019). Neuroanatomy, occipital lobe.
CC	rACC	ACA	[anatomy*]
[anatomy*] indicates the correspondence can be directly inferred from anatomical nomenclature.
